# Supplementary material for: Extraction and Characterization of Microcrystalline Cellulose from Lagenaria siceraria Fruit Pedicles
Source: MDPI journal article supplement (doi:10.3390/polym14091867), 2022-05-02
Supplement: s1 [file s1]

*Supplementary Material*

## **Extraction and Characterization of Microcrystalline Cellulose from *Lagenaria siceraria* Fruit Pedicles**

**Muhammad Asif <sup>1</sup>, Dildar Ahmed <sup>1</sup>, Naveed Ahmad <sup>2,\*</sup>, Muhammad Tariq Qamar <sup>1</sup>,  
Nabil K. Alruwaili <sup>2</sup> and Syed Nasir Abbas Bukhari <sup>3</sup>**

<sup>1</sup> Department of Chemistry, Forman Christian College (A Chartered University),  
Lahore 54600, Pakistan; masiftufail143@gmail.com (M.A.);  
dildarahmed@fccollege.edu.pk (D.A.); tariqqamar@fccollege.edu.pk (M.T.Q.)

<sup>2</sup> Department of Pharmaceutics, College of Pharmacy, Jouf University,  
Sakaka 72388, Aljouf, Saudi Arabia; nkalruwaili@ju.edu.sa

<sup>3</sup> Department of Pharmaceutical Chemistry, College of Pharmacy, Jouf University,  
Sakaka 72388, Aljouf, Saudi Arabia; sbukhari@ju.edu.sa

\* Correspondence: nakahmad@ju.edu.sa

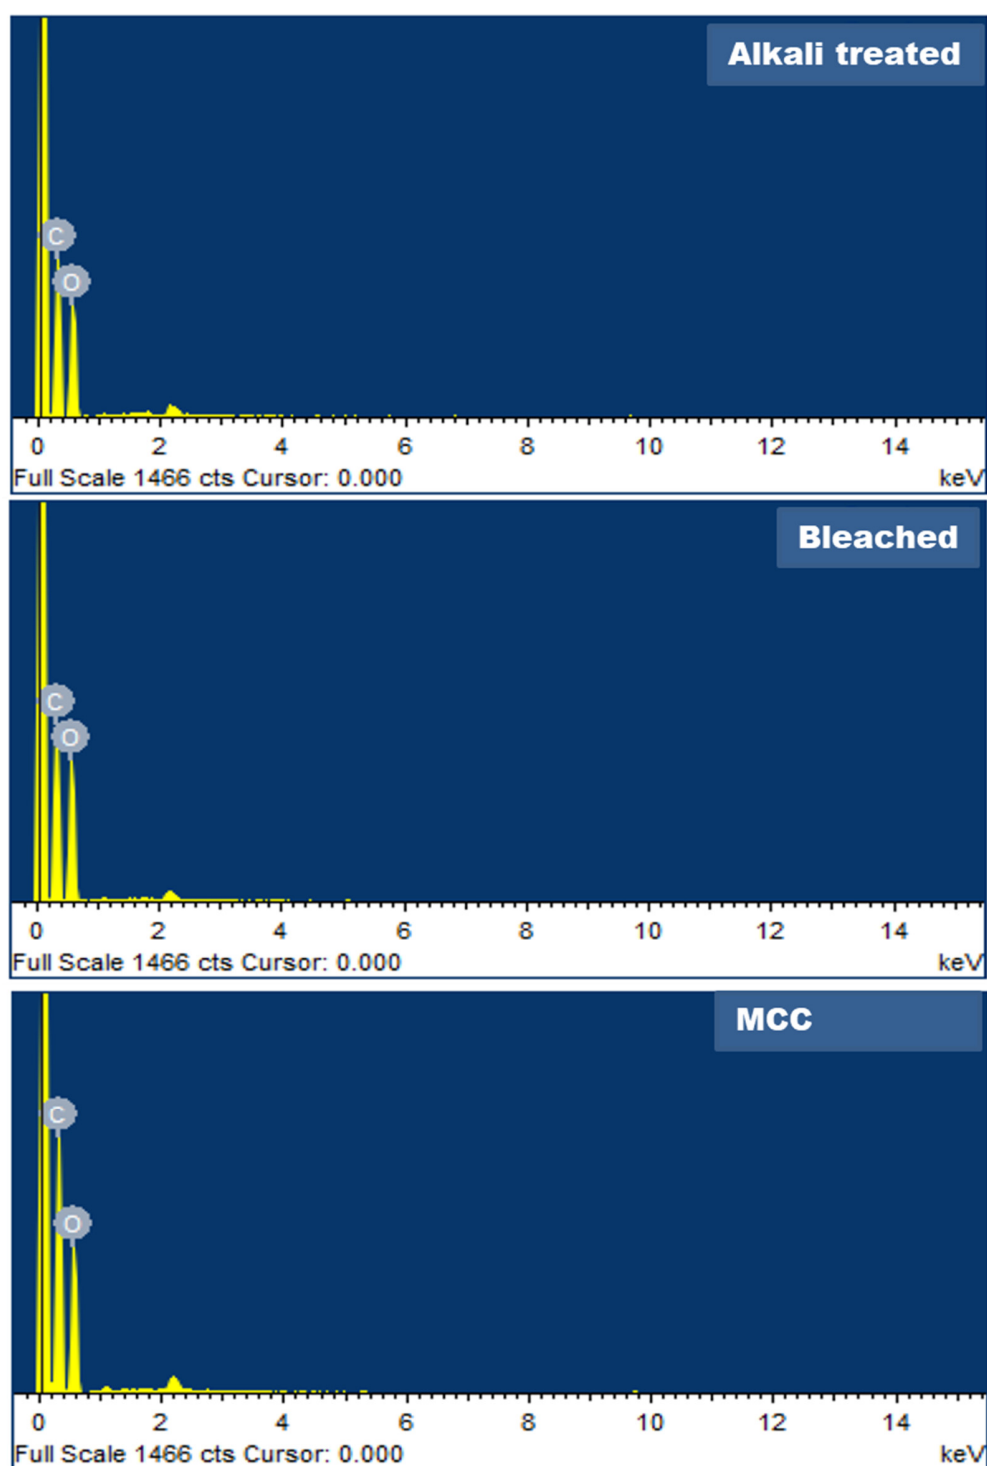

**Figure S1:** EDX spectra of alkali-treated, bleached and MCC samples obtained from *Lagenaria siceraria* fruit pedicles.
